# Supplementary material for: Phosphorylation of the amino-terminus of the AGC kinase Gad8 prevents its interaction with TORC2
Source: PubMed Central journal article supplement (PMC4821236; doi:10.1098/rsob.150189), 2016-03-02

## Supplementary Information

### Figure S1. Novel phosphorylation of Gad8 at Thr6

(A) The product ion spectrum demonstrating the phosphorylation of Gad8 at T6 with annotated peptide sequence and pertinent ions labeled. The series of b ions including b2, b4, b4<sup>++</sup>, b5 and b6 (all with Mox characteristic neutral loss of 64 Da) confirm the peptide sequence. B2, b4, b4<sup>++</sup>, b5 confirm the phosphorylation is C terminal of L5 and b6 confirms the site of phosphorylation as T6 (B) Stress response of *gad8* mutants. (C) Gad8.3HA protein levels in *T6A* and *T6D* mutants. (D) Relative Gad8 levels in *T6A* and *T6D* mutants. (E-F) Gad8 protein stability in *T6A* and *T6D* mutants. Cycloheximide was added and Gad8 levels was followed over time.

### Figure S2. Thr6 phosphorylation is not required for the response to nutrient stress.

(A) Nutrient stress of *T6A* and *T6D* and kinase dead Gad8 mutants to induce cell division. (B) Viability of *T6A* and *T6D* mutants were unaffected by nitrogen starvation.

### Figure S3. Thr6 phosphorylation does not affect kinase activity.

(A) Gad8 *in vitro* kinase assay using Tor1 as substrate and phosphor-specific Tor1.T1972 antibodies is linear. (B) The *T6A* and *T6D* mutants did not affect Gad8 *in vitro* kinase activity.

### Figure S4. Thr6 phosphorylation lies within a Protein Kinase C consensus site.

(A) Schematic of AGC kinases with the relative position of the conserved Gad8 Thr6 phosphorylation site. (B) Micrographs of heat stressed *T6A* and *T6D* mutants. (C) Heat stress response of *T6A*, *T6D* and PKC double mutants. (D) Overexpression of

Pck2 complements a *pck2.Δ* mutant. (E) Pck2 reduces Gad8.S546 phosphorylation in a *pmk1.Δ* mutant. \* Indicates a background band.

**Table S1. Strains used.**

|        |                                                   |                                                        |
|--------|---------------------------------------------------|--------------------------------------------------------|
| JP3    | <i>h-</i>                                         | lab stock                                              |
| JP350  | <i>h+</i>                                         | lab stock                                              |
| JP543  | <i>h- psk1::ura4<sup>+</sup> leu1.32 ura4.d18</i> | (Bimbo et al. 2005)                                    |
| JP598  | <i>gad8::ura4<sup>+</sup> ura4.d18</i>            | <i>gad8::ura4+</i> from (Bimbo et al. 2005)            |
| JP1411 | <i>h+ gad8.S546A</i>                              | (Halova et al. 2013)                                   |
| JP1545 | <i>gad8.T6A</i>                                   | This study                                             |
| JP2102 | <i>h+ gad8.T6D</i>                                | This study                                             |
| JP2819 | <i>gad8.T6AS546A</i>                              | This study                                             |
| JP2820 | <i>gad8.T6AS546D</i>                              | This study                                             |
| JP2821 | <i>gad8.T6DS546D</i>                              | This study                                             |
| JP2822 | <i>gad8.T6DS546A</i>                              | This study                                             |
| JP1511 | <i>gad8.K259R</i>                                 | (Du et al. 2012)                                       |
| JP2747 | <i>gad8.T6AK259R</i>                              | This study                                             |
| JP2748 | <i>gad8.T6DK259R</i>                              | This study                                             |
| JP2773 | <i>h- gad8.T6DK259R ura4.d18</i>                  | This study                                             |
| JP3125 | <i>gad8.S546A ura4.d18</i>                        | This study                                             |
| JP3126 | <i>gad8.T6DS546A ura4.d18</i>                     | This study                                             |
| JP2835 | <i>gad8.S546D</i>                                 | This study                                             |
| JP2851 | <i>h+ gad8.S546A</i>                              | This study                                             |
| JP2619 | <i>psk1::ura4+ ura4.d18</i>                       | (Bimbo et al. 2005)                                    |
| JP438  | <i>h+ pmk1::ura4+ ura4.d18</i>                    | (Bimbo et al. 2005)                                    |
| JP2846 | <i>gad8T6A sin1.13myc</i>                         | This study <i>sin1.13myc</i> from (Tatebe et al. 2010) |
| JP2345 | <i>gad8T6D sin1.13myc</i>                         | This study                                             |
| JP1992 | <i>gad8T6A-3HA:kanMX</i>                          | This study                                             |
| JP2172 | <i>pck1::ura4+ ura4.d18</i>                       | (Bimbo et al. 2005)                                    |
| JP2174 | <i>pck2::ura4+ ura4.d18</i>                       | (Bimbo et al. 2005)                                    |
| JP2712 | <i>gad8.T6D pck1::ura4+ ura4.d18</i>              | This study                                             |

|        |                                                     |                                                    |
|--------|-----------------------------------------------------|----------------------------------------------------|
| JP2850 | <i>gad8.T6D pck2::ura4+ ura4.d18</i>                | This study                                         |
| JP2623 | <i>gad8.T6A pck1::ura4+ ura4.d18</i>                | This study                                         |
| JP2625 | <i>gad8.T6A pck2::ura4+ ura4.d18</i>                | This study                                         |
| JP2970 | <i>sin1.13myc ura4.d18 +<br/>pJP642: nmt42-pck2</i> | This study                                         |
| JP2971 | <i>sin1.13myc ura4.d18 +<br/>pJP5: nmt42-empty</i>  | <i>sin1.13myc</i> from<br>(Tatebe et al. 2010)     |
| JP2201 | <i>gad8T6A ura4.d18</i>                             | This study                                         |
| JP2202 | <i>gad8T6D ura4.d18</i>                             | This study                                         |
| JP2585 | <i>gad8.T6A mcherry-lifeact</i>                     | <i>mcherry-lifeact</i> from<br>(Huang et al. 2012) |
| JP2587 | <i>gad8.T6D mcherry-lifeact</i>                     | This study                                         |
| JP2640 | <i>mcherry-lifeact</i>                              | This study                                         |

- Bimbo A, Jia Y, Poh SL, Karuturi RK, den Elzen N, Peng X, Zheng L, O'Connell M, Liu ET, Balasubramanian MK et al. 2005. Systematic deletion analysis of fission yeast protein kinases. *Eukaryotic cell* **4**: 799-813.
- Du W, Hálová L, Kirkham S, Atkin J, Petersen J. 2012. TORC2 and the AGC kinase Gad8 regulate phosphorylation of the ribosomal protein S6 in fission yeast. *Biology Open* **1**: 884-888.
- Halova L, Du W, Kirkham S, Smith DL, Petersen J. 2013. Phosphorylation of the TOR ATP binding domain by AGC kinase constitutes a novel mode of TOR inhibition. *The Journal of cell biology* **203**: 595-604.
- Huang, J., Huang, Y., Yu, H., Subramanian, D., Padmanabhan, A., Thadani, R., Tao, Y., Tang, X., Wedlich-Soldner, R., and Balasubramanian, M.K. (2012). Nonmedially assembled F-actin cables incorporate into the actomyosin ring in fission yeast. *The Journal of cell biology* **199**, 831-847.
- Tatebe H, Morigasaki S, Murayama S, Zeng CT, Shiozaki K. 2010. Rab-family GTPase regulates TOR complex 2 signaling in fission yeast. *Curr Biol* **20**: 1975-1982.

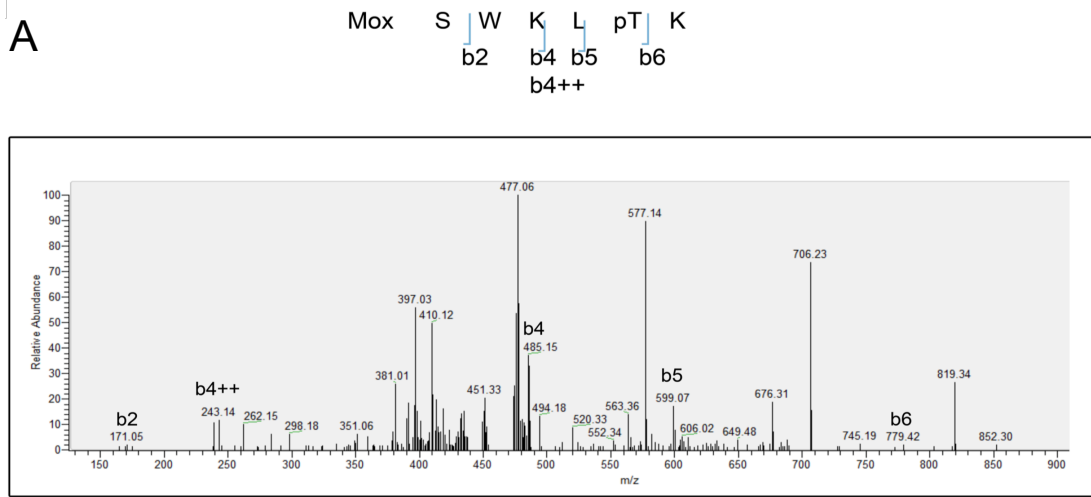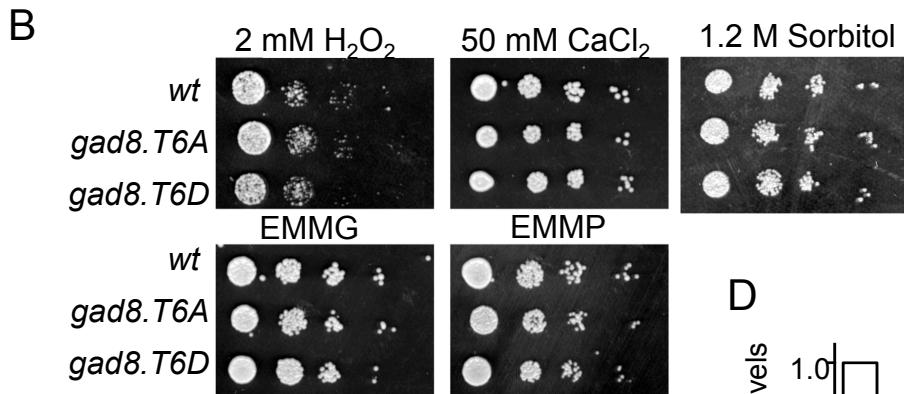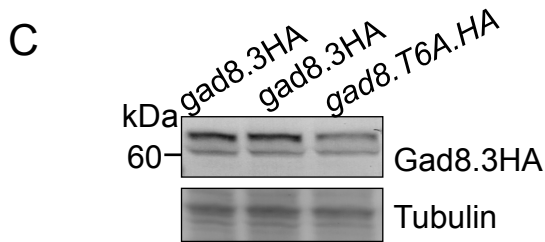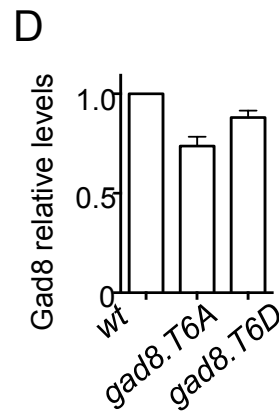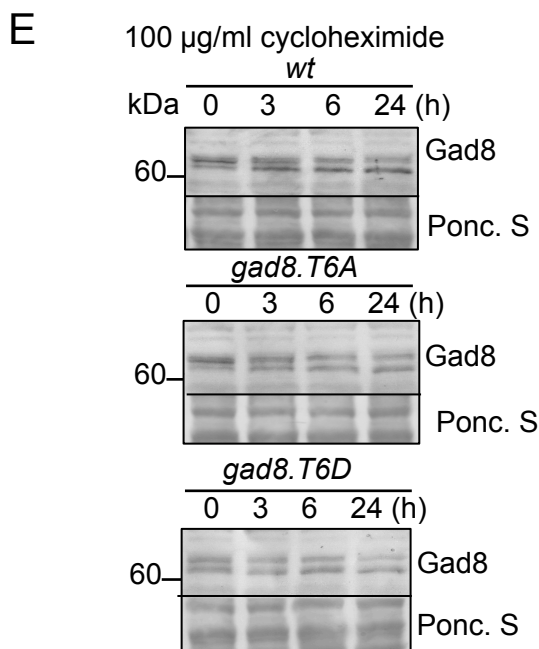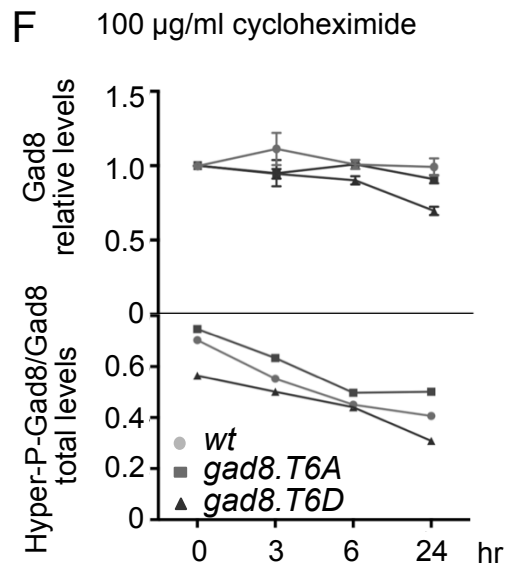

A

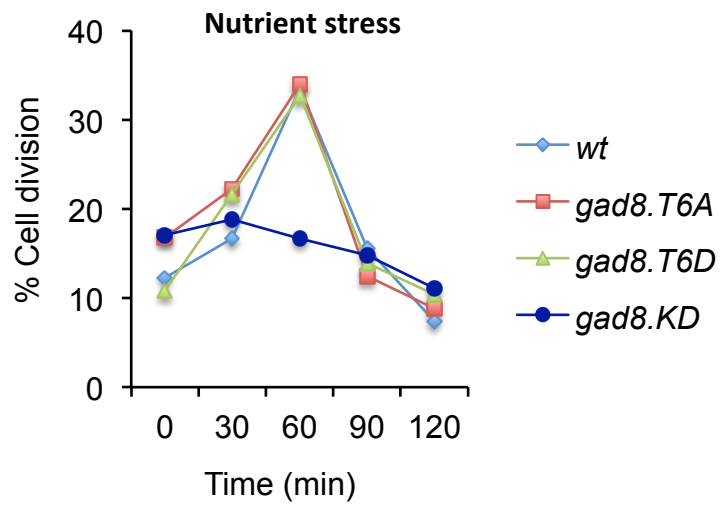

B

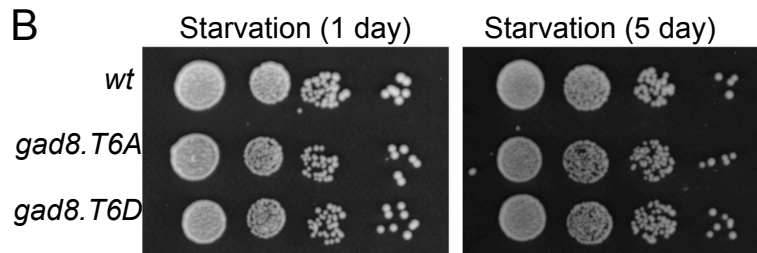

A

Gad8 kinase assay

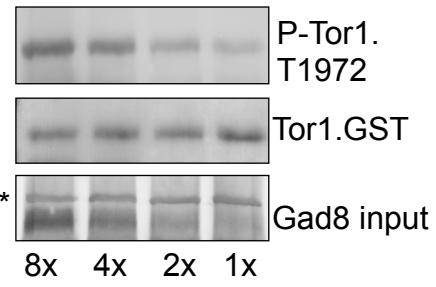

B

Gad8 kinase assay

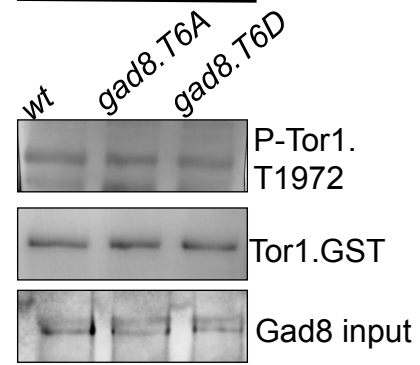

A

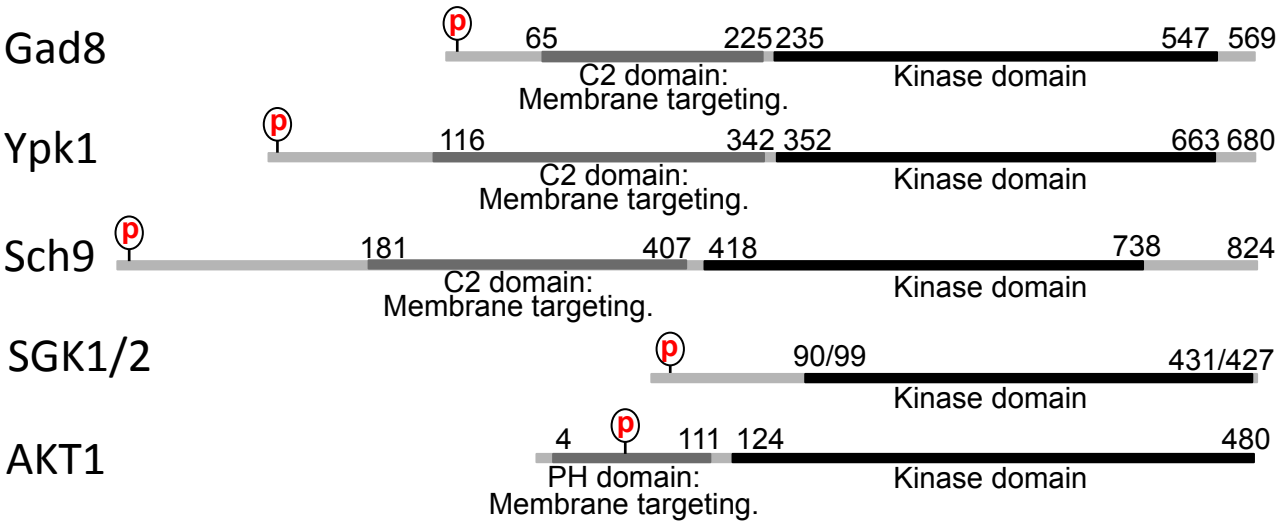

= predicted amino terminal PKC site

B

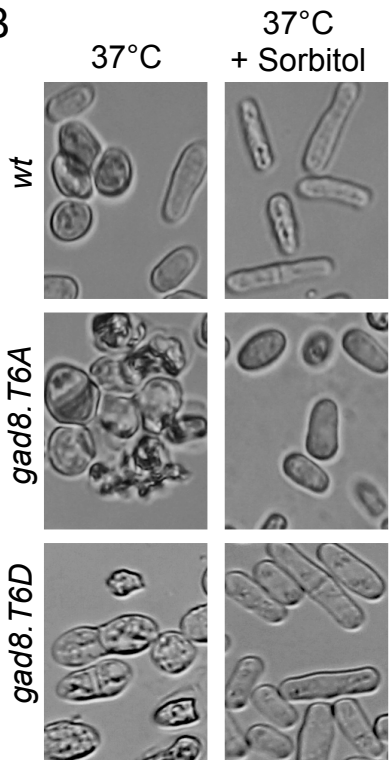

C

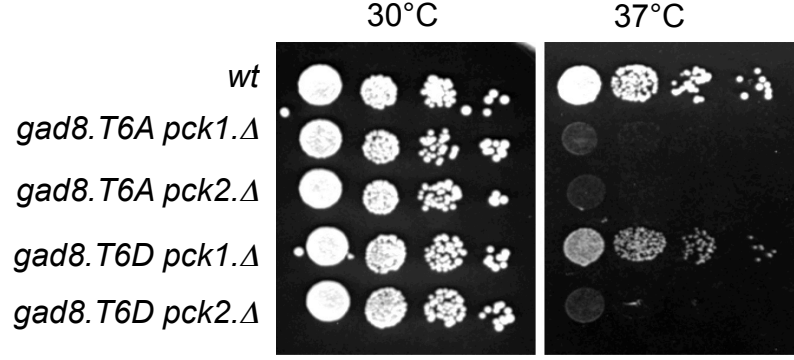

D

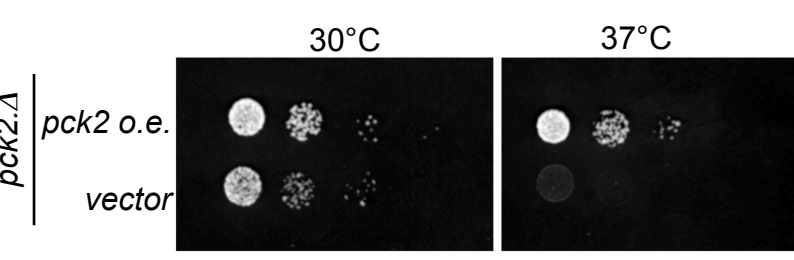

E

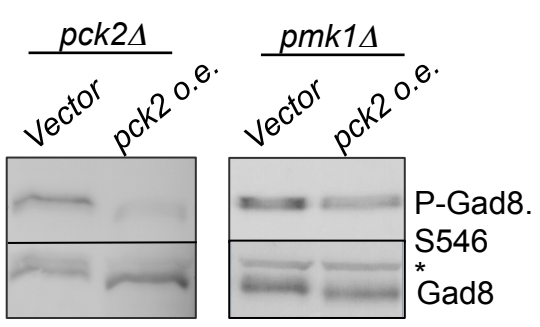

Supplement: rsob150189supp1.pdf [file rsob150189supp1.pdf]
